# Supplementary material for: Poly (Amidehydrazide) Hydrogel Particles for Removal of Cu2+ and Cd2+ Ions from Water
Source: MDPI journal article supplement (doi:10.3390/gels7030121), 2021-08-12
Supplement: s1 [file s1]

# Poly (Amidehydrazide) Hydrogel Particles for Removal of $\text{Cu}^{2+}$ and $\text{Cd}^{2+}$ Ions from Water

Hojung Choi, Taehyoung Kim and Sang Youl Kim \*

## Supplementary Materials:

### 1. Optical Microscope (OM) images of ADH-PAMH<sub>x</sub>, SDH-PAMH<sub>x</sub> and MDH-PAMH<sub>x</sub>

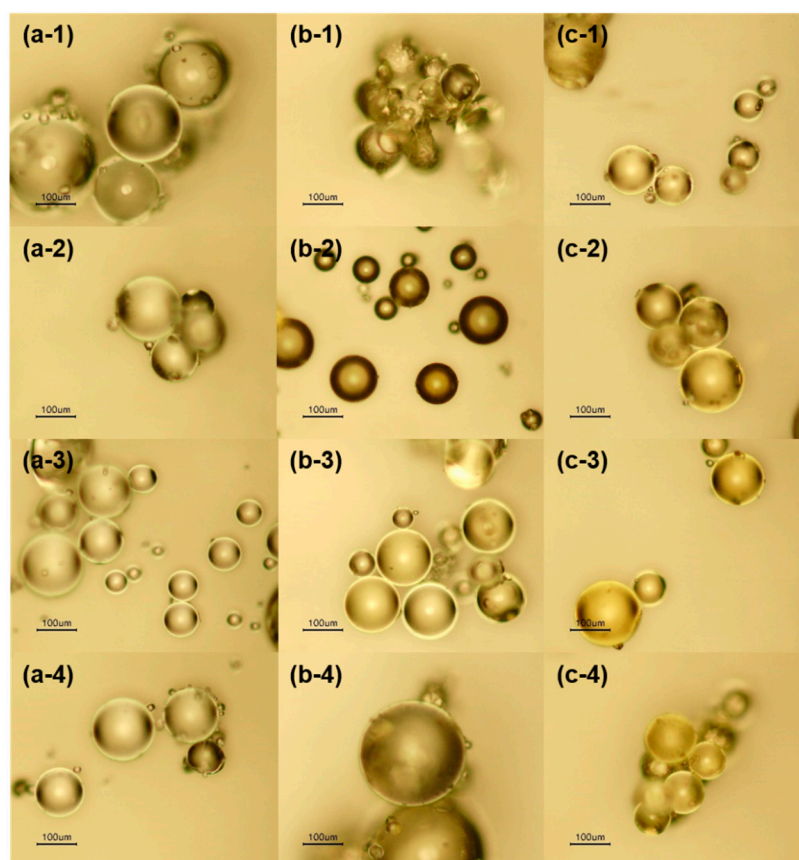

**Figure S1.** OM images of ADH-PAMH<sub>x</sub> (a), SDH-PAMH<sub>x</sub> (b), MDH-PAMH<sub>x</sub> (c) for different  $x$  of 1.25 (1), 1.5 (2), 1.75 (3), 2 (4). For example, (b-2) is an image of SDH-PAMH<sub>1.5</sub>.

## 2. ATR-IR spectra of SDH-PAMH<sub>x</sub> and MDH-PAMH<sub>x</sub>

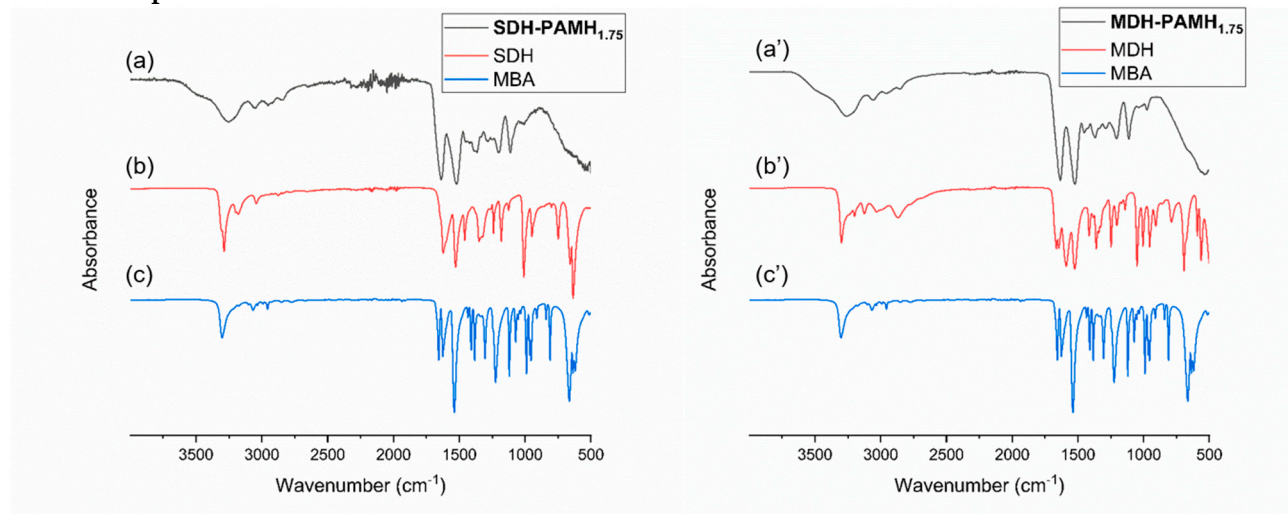

Figure S2. ATR-IR spectra of SDH-PAMH<sub>1.75</sub> (a), SDH (b), MBA (c), MDH-PAMH<sub>1.75</sub> (a'), MDH (b'), MBA (c'). .

## 3. Scanning Electron Microscopy (SEM) images and EDX analysis of ADH-PAMH<sub>1.75</sub>, SDH-PAMH<sub>1.75</sub> and MDH-PAMH<sub>1.75</sub>

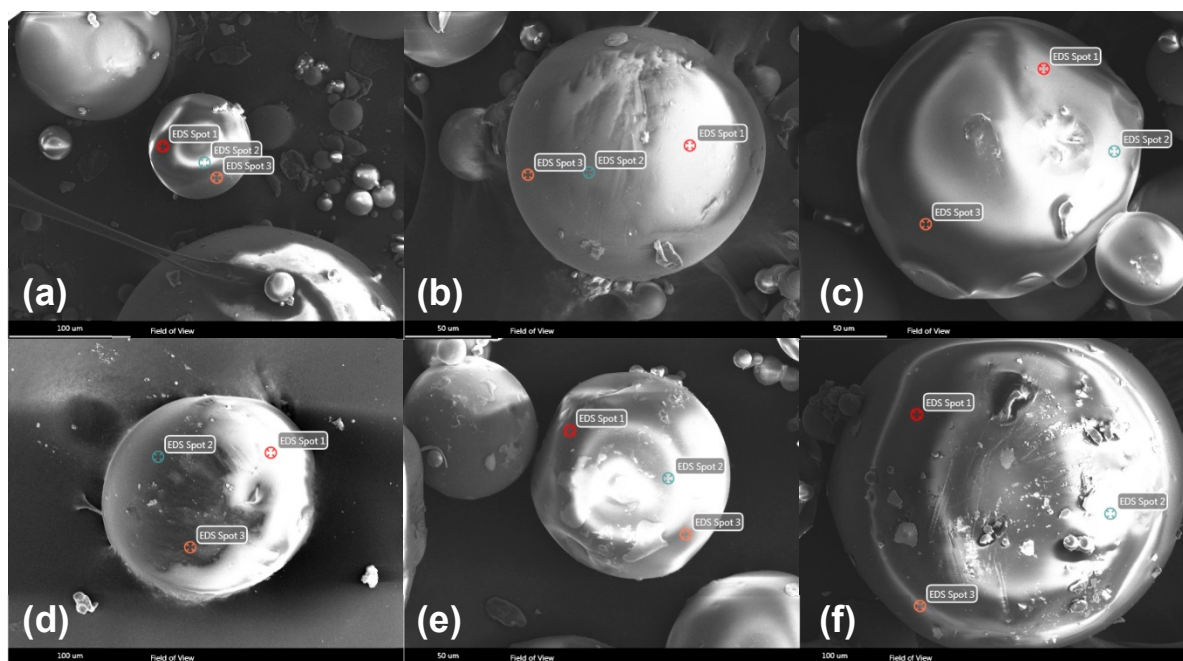

Figure S3. SEM images of ADH-PAMH<sub>1.75</sub> (a,d), SDH-PAMH<sub>1.75</sub> (b,e), MDH-PAMH<sub>1.75</sub> (c,f) for Cu<sup>2+</sup> sorption (a,b,c) and Cd<sup>2+</sup> sorption (d,e,f).

**Table S1.** EDX data of ADH-PAMH<sub>1.75</sub>, SDH-PAMH<sub>1.75</sub>, and MDH-PAMH<sub>1.75</sub>. all values of table are weight percent (%).

| Element | ADH-PAMH <sub>1.75</sub> |                  | SDH-PAMH <sub>1.75</sub> |                  | MDH-PAMH <sub>1.75</sub> |                  |
|---------|--------------------------|------------------|--------------------------|------------------|--------------------------|------------------|
|         | Cu <sup>2+</sup>         | Cd <sup>2+</sup> | Cu <sup>2+</sup>         | Cd <sup>2+</sup> | Cu <sup>2+</sup>         | Cd <sup>2+</sup> |
| C K     | 45.43                    | 55.94            | 38.97                    | 47.43            | 39.52                    | 47.34            |
| N K     | 19.70                    | 22.21            | 18.63                    | 23.02            | 26.94                    | 18.24            |
| O K     | 14.89                    | 16.08            | 14.64                    | 14.48            | 17.68                    | 23.95            |
| Cu L    | 10.38                    | -                | 13.43                    | -                | 10.70                    | -                |
| Cd L    | -                        | 3.84             | -                        | 10.34            | -                        | 7.67             |
| Cl K    | 9.59                     | 1.93             | 14.32                    | 4.73             | 5.15                     | 2.81             |

#### 4. Cu<sup>2+</sup> sorption test in acidic condition

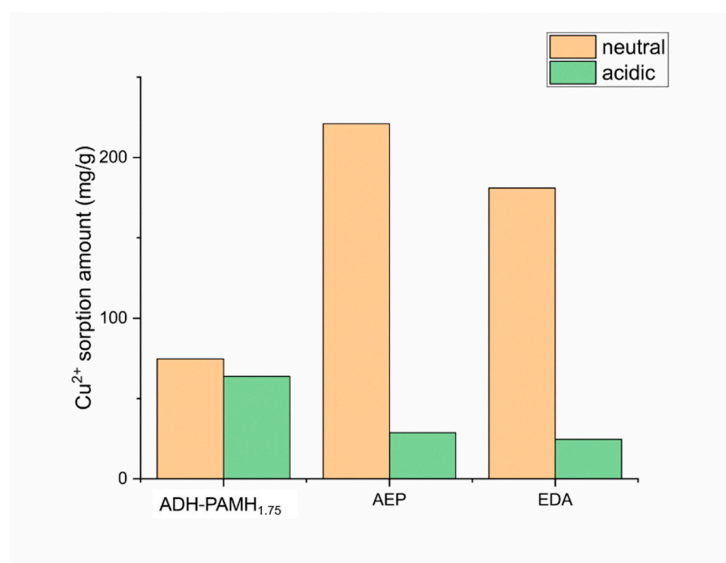**Figure S4.** Cu<sup>2+</sup> sorption test in acidic condition (pH 4) and neutral condition. AEP is PAMAM gel consist of aminoethylpiperazine and MBA, EDA is PAMAM gel consist of ethylenediamine and MBA.

#### 5. Cu<sup>2+</sup> sorption isotherm of dihydrazide-PAMH<sub>x</sub>

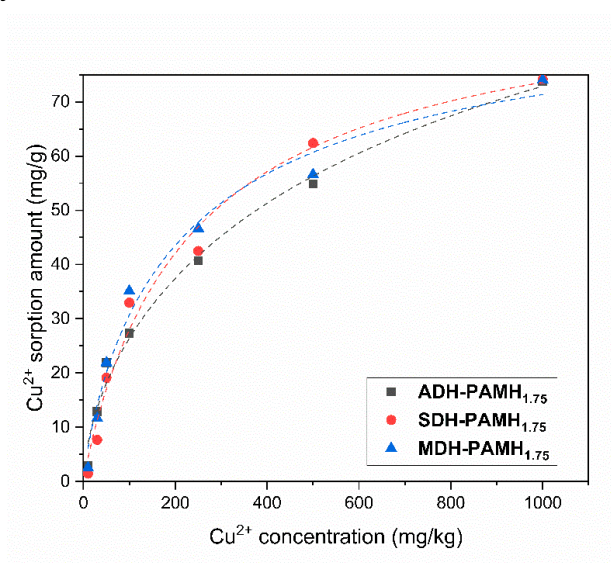**Figure S5.** Cu<sup>2+</sup> Sorption isotherm of ADH-PAMH<sub>1.75</sub>, SDH-PAMH<sub>1.75</sub>, and MDH-PAMH<sub>1.75</sub>.

## 6. FT-IR spectroscopy for metal-complexd ADH-PAMH<sub>1.75</sub>

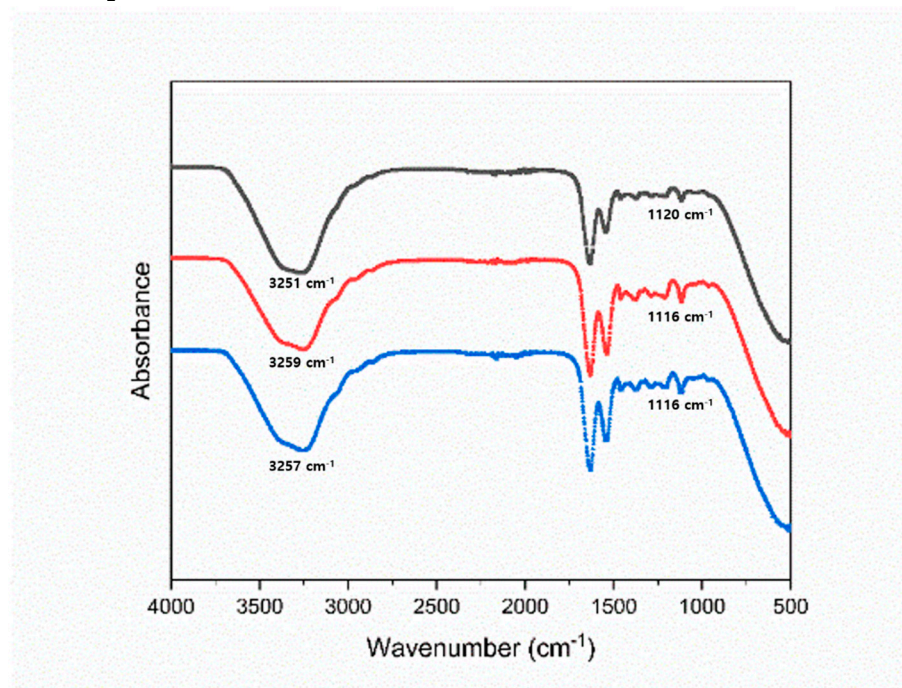

**Figure S6.** ATR-IR for metal absorbed ADH-PAMH<sub>1.75</sub> (black: wet ADH-PAMH<sub>1.75</sub>, red: Cu<sup>2+</sup> absorbed ADH-PAMH<sub>1.75</sub>, blue: Cd<sup>2+</sup> absorbed ADH-PAMH<sub>1.75</sub>)
